# Supplementary material for: Ecological Guild Evolution and the Discovery of the World's Smallest Vertebrate
Source: PubMed Central journal article supplement (PMC3256195; doi:10.1371/journal.pone.0029797), 2012-01-11
Supplement: pone.0029797.s002.pdf [file pone.0029797.s002.pdf]

**Table S1. Samples included in molecular phylogenetic analyses.** Specimens and Genbank accession numbers for samples used in phylogenetic analyses.

Bolded lettering indicates sequences collected for this study.

| Family              | Subfamily             | Genus                         | Species                | Locality                      | Voucher No.        | GenBank Accession No. |                 |
|---------------------|-----------------------|-------------------------------|------------------------|-------------------------------|--------------------|-----------------------|-----------------|
|                     |                       |                               |                        |                               |                    | 12S                   | 16S             |
| Arthroleptidae      | Arthroleptinae        | <i>Arthroleptis</i>           | <i>tanneri</i>         | Tanzania: West Usumbaras Mts  | RdS 929            | DQ283427              | DQ283427        |
| Arthroleptidae      | Leptopelinae          | <i>Leptopelis</i>             | <i>argenteus</i>       | Kenya: Kilifi District        | CAS 169938         | DQ283226              | DQ283226        |
| Brevicipitidae      | —                     | <i>Breviceps</i>              | <i>mossambicus</i>     | Tanzania: Morogoro            | RdS 903            | DQ283155              | DQ283155        |
| Brevicipitidae      | —                     | <i>Callulina</i>              | <i>kisiwamsitu</i>     | Tanzania: West Usumbara Mts.  | RdS936             | DQ283429              | DQ283429        |
| Hemisotidae         | —                     | <i>Hemismus</i>               | <i>marmoratus</i>      | Tanzania: Arusha: Masai Camp  | RdS 916            | DQ283430              | DQ283430        |
| Hyperoliidae        | —                     | <i>Hyperolius</i>             | <i>castaneus</i>       | Uganda: Kabale Dist.          | CAS 202372         | FJ151059              | FJ151059        |
| Hyperoliidae        | —                     | <i>Kassina</i>                | <i>senegalensis</i>    | Tanzania: Iringa              | RdS 803            | DQ283437              | DQ283437        |
| Microhylidae        | Asterophryinae        | <i>Albericus</i>              | <i>laurini</i>         | WNG: Wondiwoi Mts.            | ZMB 61913          | EU100220              | EU100104        |
| Microhylidae        | Asterophryinae        | <i>Albericus</i>              | <i>laurini</i>         | WNG: Wondiwoi Mts.            | ZMB 70311          | EU100221              | EU100105        |
| Microhylidae        | Asterophryinae        | <i>Albericus</i>              | <i>laurini</i>         | WNG: Wondiwoi Mts.            | ZMB 70312          | EU100222              | EU100106        |
| Microhylidae        | Asterophryinae        | <i>Albericus</i>              | <i>laurini</i>         | WNG: Wondiwoi Mts.            | ZMB 70313          | EU100223              | EU100107        |
| Microhylidae        | Asterophryinae        | <i>Aphantophryne</i>          | <i>pansa</i>           | PNG: Morobe: Bulolo           | ABTC 49605         | DQ283195              | DQ283195        |
| Microhylidae        | Asterophryinae        | <i>Asterophrys</i>            | <i>turpicola</i>       | WNG: Wondiwoi Mts.            | ZMB 62043          | EU100224              | EU100108        |
| Microhylidae        | Asterophryinae        | <i>Asterophrys</i>            | <i>turpicola</i>       | WNG: Yapen Isl.               | ZMB 64105          | EU100225              | EU100109        |
| Microhylidae        | Asterophryinae        | <i>Asterophrys</i>            | <i>turpicola</i>       | WNG: Yapen Isl.               | ZMB 64106          | EU100226              | EU100110        |
| Microhylidae        | Asterophryinae        | <i>Austrochaperina</i>        | <i>derongo</i>         | WNG: Wapoga camp              | SR3213             | EU100229              | EU100113        |
| <b>Microhylidae</b> | <b>Asterophryinae</b> | <b><i>Austrochaperina</i></b> | <b><i>derongo</i></b>  | <b>PNG: Gulf: Sobo</b>        | <b>LSUMZ 95043</b> | <b>JN049006</b>       | <b>JN048981</b> |
| <b>Microhylidae</b> | <b>Asterophryinae</b> | <b><i>Austrochaperina</i></b> | <b><i>derongo</i></b>  | <b>PNG: Gulf: Sobo</b>        | <b>LSUMZ 95044</b> | <b>JN049008</b>       | <b>JN048983</b> |
| Microhylidae        | Asterophryinae        | <i>Austrochaperina</i>        | <i>cf. derongo</i>     | WNG: Yapen Isl.               | ZMB 70334          | EU100230              | EU100114        |
| Microhylidae        | Asterophryinae        | <i>Austrochaperina</i>        | <i>cf. derongo</i>     | WNG: Yapen Isl.               | ZMB 70335          | EU100231              | EU100115        |
| Microhylidae        | Asterophryinae        | <i>Austrochaperina</i>        | <i>cf. derongo</i>     | WNG: Yapen Isl.               | ZMB 70329          | EU100232              | EU100116        |
| <b>Microhylidae</b> | <b>Asterophryinae</b> | <b><i>Austrochaperina</i></b> | <b><i>guttata</i></b>  | <b>PNG: Gulf: Sobo</b>        | <b>LSUMZ 95008</b> | <b>JN049004</b>       | <b>JN048979</b> |
| <b>Microhylidae</b> | <b>Asterophryinae</b> | <b><i>Austrochaperina</i></b> | <b><i>palmipes</i></b> | <b>PNG: Gulf: Sobo</b>        | <b>LSUMZ 95083</b> | <b>JN049007</b>       | <b>JN048982</b> |
| <b>Microhylidae</b> | <b>Asterophryinae</b> | <b><i>Austrochaperina</i></b> | <b><i>palmipes</i></b> | <b>PNG: Milne Bay: Alotau</b> | <b>LSUMZ 95055</b> | <b>JN049017</b>       | <b>JN048992</b> |
| Microhylidae        | Asterophryinae        | <i>Austrochaperina</i>        | <i>sp.</i>             | PNG: S. Highlands: Namosado   | AMS R122221        | DQ283205              | DQ283205        |
| Microhylidae        | Asterophryinae        | <i>Austrochaperina</i>        | <i>sp. 1</i>           | WNG: Wondiwoi Mts.            | ZMB 70324          | EU100227              | EU100111        |
| Microhylidae        | Asterophryinae        | <i>Austrochaperina</i>        | <i>sp. 1</i>           | WNG: Wondiwoi Mts.            | ZMB 70325          | EU100228              | EU100112        |
| Microhylidae        | Asterophryinae        | <i>Austrochaperina</i>        | <i>sp. 2</i>           | WNG: Wondiwoi Mts.            | ZMB 70326          | EU100233              | EU100117        |
| Microhylidae        | Asterophryinae        | <i>Austrochaperina</i>        | <i>sp. 2</i>           | WNG: Wondiwoi Mts.            | ZMB 70327          | EU100234              | EU100118        |
| Microhylidae        | Asterophryinae        | <i>Barygenys</i>              | <i>exsul</i>           | PNG: Milne Bay: Rossel Isl.   | BPBM 20128         | EU100235              | EU100119        |
| Microhylidae        | Asterophryinae        | <i>Callulops</i>              | <i>robustus</i>        | WNG: Wondiwoi Mts.            | ZMB 62037          | EU100247              | EU100131        |
| Microhylidae        | Asterophryinae        | <i>Callulops</i>              | <i>robustus</i>        | WNG: Wondiwoi Mts.            | ZMB 70315          | EU100250              | EU100134        |
| Microhylidae        | Asterophryinae        | <i>Callulops</i>              | <i>robustus</i>        | WNG: Wondiwoi Mts.            | ZMB 70316          | EU100251              | EU100135        |
| Microhylidae        | Asterophryinae        | <i>Callulops</i>              | <i>robustus</i>        | WNG: Wondiwoi Mts.            | ZMB 63874          | EU100246              | EU100130        |
| Microhylidae        | Asterophryinae        | <i>Callulops</i>              | <i>robustus</i>        | WNG: Biak Isl.                | ZMB 64107          | EU100248              | EU100132        |
| Microhylidae        | Asterophryinae        | <i>Callulops</i>              | <i>robustus</i>        | WNG: Biak Isl.                | ZMB 64108          | EU100249              | EU100133        |
| Microhylidae        | Asterophryinae        | <i>Choerophryne</i>           | <i>rostellifer</i>     | WNG: Wondiwoi Mts.            | ZMB 70359          | EU100253              | EU100137        |
| Microhylidae        | Asterophryinae        | <i>Choerophryne</i>           | <i>rostellifer</i>     | WNG: Wondiwoi Mts.            | ZMB 70360          | EU100254              | EU100138        |
| Microhylidae        | Asterophryinae        | <i>Choerophryne</i>           | <i>longirostris</i>    | PNG: Sandaun: Mt. Menawa      | ABTC 47720         | DQ283207              | DQ283207        |

|              |                |                     |                    |                             |                |          |          |
|--------------|----------------|---------------------|--------------------|-----------------------------|----------------|----------|----------|
| Microhylidae | Asterophryinae | <i>Choerophryne</i> | <i>sp. 1</i>       | WNG: Yapen Isl.             | ZMB 70342      | EU100252 | EU100136 |
| Microhylidae | Asterophryinae | <i>Choerophryne</i> | <i>sp. 2</i>       | WNG: Yapen Isl.             | ZMB 70346      | EU100255 | EU100139 |
| Microhylidae | Asterophryinae | <i>Choerophryne</i> | <i>sp. 2</i>       | WNG: Yapen Isl.             | ZMB 70348      | EU100256 | EU100140 |
| Microhylidae | Asterophryinae | <i>Choerophryne</i> | <i>sp. 2</i>       | WNG: Yapen Isl.             | ZMB 70352      | EU100257 | EU100141 |
| Microhylidae | Asterophryinae | <i>Choerophryne</i> | <i>sp. 3</i>       | WNG: Yapen Isl.             | ZMB 70354      | EU100258 | EU100142 |
| Microhylidae | Asterophryinae | <i>Cophixalus</i>   | <i>balbus</i>      | WNG: Yapen Isl.             | ZMB 62594      | EU100259 | EU100143 |
| Microhylidae | Asterophryinae | <i>Cophixalus</i>   | <i>balbus</i>      | WNG: Yapen Isl.             | ZMB 62595      | EU100260 | EU100144 |
| Microhylidae | Asterophryinae | <i>Cophixalus</i>   | <i>balbus</i>      | WNG: Yapen Isl.             | ZMB 62596      | EU100261 | EU100145 |
| Microhylidae | Asterophryinae | <i>Cophixalus</i>   | <i>balbus</i>      | WNG: Yapen Isl.             | ZMB 62597      | EU100262 | EU100146 |
| Microhylidae | Asterophryinae | <i>Cophixalus</i>   | <i>humicola</i>    | WNG: Yapen Isl.             | ZMB 69704      | EU100263 | EU100147 |
| Microhylidae | Asterophryinae | <i>Cophixalus</i>   | <i>humicola</i>    | WNG: Yapen Isl.             | ZMB 69705      | EU100264 | EU100148 |
| Microhylidae | Asterophryinae | <i>Cophixalus</i>   | <i>sphagnicola</i> | PNG: Morobe: Wau            | ABTC 47881     | DQ283206 | DQ283206 |
| Microhylidae | Asterophryinae | <i>Cophixalus</i>   | <i>tridactylus</i> | WNG: Wondiwoi Mts.          | ZMB 69696      | EU100265 | EU100149 |
| Microhylidae | Asterophryinae | <i>Cophixalus</i>   | <i>tridactylus</i> | WNG: Wondiwoi Mts.          | ZMB 69698      | EU100266 | EU100150 |
| Microhylidae | Asterophryinae | <i>Cophixalus</i>   | <i>tridactylus</i> | WNG: Wondiwoi Mts.          | ZMB 69700      | EU100267 | EU100151 |
| Microhylidae | Asterophryinae | <i>Copiula</i>      | <i>major</i>       | WNG: Wondiwoi Mts.          | ZMB 62074      | EU100268 | EU100152 |
| Microhylidae | Asterophryinae | <i>Copiula</i>      | <i>major</i>       | WNG: Wondiwoi Mts.          | ZMB 62564      | EU100269 | EU100153 |
| Microhylidae | Asterophryinae | <i>Copiula</i>      | <i>obsti</i>       | WNG: Yapen Isl.             | ZMB 62555      | EU100270 | EU100154 |
| Microhylidae | Asterophryinae | <i>Copiula</i>      | <i>obsti</i>       | WNG: Yapen Isl.             | ZMB 62554      | EU100271 | EU100155 |
| Microhylidae | Asterophryinae | <i>Copiula</i>      | <i>obsti</i>       | WNG: Yapen Isl.             | ZMB 70189      | EU100272 | EU100156 |
| Microhylidae | Asterophryinae | <i>Copiula</i>      | <i>obsti</i>       | WNG: Yapen Isl.             | ZMB 70190      | EU100273 | EU100157 |
| Microhylidae | Asterophryinae | <i>Copiula</i>      | <i>pipiens</i>     | WNG: Yapen Isl.             | ZMB 64112      | EU100274 | EU100158 |
| Microhylidae | Asterophryinae | <i>Copiula</i>      | <i>sp.</i>         | PNG: Madang: Sinyarge       | AMS R124417    | DQ283208 | DQ283208 |
| Microhylidae | Asterophryinae | <i>Genyophryne</i>  | <i>thomsoni</i>    | PNG: Milne Bay: Sudest Isl. | BPBM 20357     | EU100275 | EU100159 |
| Microhylidae | Asterophryinae | <i>Genyophryne</i>  | <i>thomsoni</i>    | PNG: Morobe: Bulolo         | ABTC 49624     | DQ283209 | DQ283209 |
| Microhylidae | Asterophryinae | <i>Hylophorbus</i>  | <i>nigrinus</i>    | WNG: Yapen Isl.             | ZMB 62404      | EU100276 | EU100160 |
| Microhylidae | Asterophryinae | <i>Hylophorbus</i>  | <i>picoides</i>    | WNG: Wondiwoi Mts.          | ZMB 61972      | EU100278 | EU100162 |
| Microhylidae | Asterophryinae | <i>Hylophorbus</i>  | <i>picoides</i>    | WNG: Wondiwoi Mts.          | ZMB 61979      | EU100279 | EU100163 |
| Microhylidae | Asterophryinae | <i>Hylophorbus</i>  | <i>picoides</i>    | WNG: Wondiwoi Mts.          | ZMB 61977      | EU100280 | EU100164 |
| Microhylidae | Asterophryinae | <i>Hylophorbus</i>  | <i>picoides</i>    | WNG: Wondiwoi Mts.          | ZMB 70306      | EU100281 | EU100165 |
| Microhylidae | Asterophryinae | <i>Hylophorbus</i>  | <i>picoides</i>    | WNG: Wondiwoi Mts.          | ZMB 70307      | EU100282 | EU100166 |
| Microhylidae | Asterophryinae | <i>Hylophorbus</i>  | <i>picoides</i>    | WNG: Wondiwoi Mts.          | ZMB 61973      | EU100277 | EU100161 |
| Microhylidae | Asterophryinae | <i>Hylophorbus</i>  | <i>tetraphonus</i> | WNG: Wondiwoi Mts.          | ZMB 61987      | EU100283 | EU100167 |
| Microhylidae | Asterophryinae | <i>Hylophorbus</i>  | <i>tetraphonus</i> | WNG: Wondiwoi Mts.          | ZMB 61989      | EU100284 | EU100168 |
| Microhylidae | Asterophryinae | <i>Hylophorbus</i>  | <i>tetraphonus</i> | WNG: Wondiwoi Mts.          | ZMB 70318      | EU100287 | EU100171 |
| Microhylidae | Asterophryinae | <i>Hylophorbus</i>  | <i>tetraphonus</i> | WNG: Yapen Isl.             | ZMB 70319      | EU100285 | EU100169 |
| Microhylidae | Asterophryinae | <i>Hylophorbus</i>  | <i>tetraphonus</i> | WNG: Yapen Isl.             | ZMB 70320      | EU100286 | EU100170 |
| Microhylidae | Asterophryinae | <i>Hylophorbus</i>  | <i>tetraphonus</i> | WNG: Nabire-Mapia road      | ZMB 70322      | EU100288 | EU100172 |
| Microhylidae | Asterophryinae | <i>Hylophorbus</i>  | <i>tetraphonus</i> | WNG: Nabire-Mapia road      | ZMB 70323      | EU100289 | EU100173 |
| Microhylidae | Asterophryinae | <i>Hylophorbus</i>  | <i>wondiwoi</i>    | WNG: Wondiwoi Mts.          | ZMB 61995-RG67 | EU100290 | EU100174 |
| Microhylidae | Asterophryinae | <i>Hylophorbus</i>  | <i>wondiwoi</i>    | WNG: Wondiwoi Mts.          | ZMB 61995-RG67 | EU100291 | EU100175 |
| Microhylidae | Asterophryinae | <i>Hylophorbus</i>  | <i>wondiwoi</i>    | WNG: Wondiwoi Mts.          | ZMB 62396      | EU100292 | EU100176 |
| Microhylidae | Asterophryinae | <i>Hylophorbus</i>  | <i>wondiwoi</i>    | WNG: Wondiwoi Mts.          | ZMB 70317      | EU100293 | EU100177 |

|              |                |                     |                         |                                  |             |          |          |
|--------------|----------------|---------------------|-------------------------|----------------------------------|-------------|----------|----------|
| Microhylidae | Asterophryinae | <i>Hylophorbus</i>  | <i>cf. wondiwoi</i>     | PNG: Gulf: Sobo                  | LSUMZ 94942 | JN049026 | JN049001 |
| Microhylidae | Asterophryinae | <i>Hylophorbus</i>  | <i>sp. 1</i>            | PNG: Sandaun: Utai               | LSUMZ 93041 | JN049011 | JN048986 |
| Microhylidae | Asterophryinae | <i>Hylophorbus</i>  | <i>sp. 1</i>            | PNG: Sandaun: Utai               | LSUMZ 93070 | JN049015 | JN048990 |
| Microhylidae | Asterophryinae | <i>Hylophorbus</i>  | <i>sp. 2</i>            | PNG: Milne Bay: Alotau           | LSUMZ 94897 | JN049018 | JN048993 |
| Microhylidae | Asterophryinae | <i>Hylophorbus</i>  | <i>sp. 2</i>            | PNG: Central: Amau               | LSUMZ 94923 | JN049022 | JN048997 |
| Microhylidae | Asterophryinae | <i>Liophryne</i>    | <i>dentata</i>          | PNG: Milne Bay: Cloudy Mts.      | BPBM 15370  | EU100294 | EU100178 |
| Microhylidae | Asterophryinae | <i>Liophryne</i>    | <i>rhododactyla</i>     | PNG: Morobe: Bulolo              | ABTC 49566  | DQ283199 | DQ283199 |
| Microhylidae | Asterophryinae | <i>Liophryne</i>    | <i>schlaginhaufeni</i>  | PNG: Sandaun: Toricelli Mts.     | BPBM 22754  | EU100295 | EU100179 |
| Microhylidae | Asterophryinae | <i>Mantophryne</i>  | <i>lateralis</i>        | PNG: Sandaun: Utai               | LSUMZ 92102 | JN049014 | JN048989 |
| Microhylidae | Asterophryinae | <i>Mantophryne</i>  | <i>lateralis</i>        | PNG: Milne Bay: Halowia          | LSUMZ 92107 | JN049016 | JN048991 |
| Microhylidae | Asterophryinae | <i>Mantophryne</i>  | <i>lateralis</i>        | PNG: Central: Amau               | LSUMZ 94799 | JN049020 | JN048995 |
| Microhylidae | Asterophryinae | <i>Mantophryne</i>  | <i>lateralis</i>        | PNG: Gulf: Sobo                  | LSUMZ 94805 | JN049025 | JN049000 |
| Microhylidae | Asterophryinae | <i>Metamagnusia</i> | <i>marani</i>           | WNG: Wondiwoi Mts.               | ZMB 63882   | EU100237 | EU100121 |
| Microhylidae | Asterophryinae | <i>Metamagnusia</i> | <i>marani</i>           | WNG: Wondiwoi Mts.               | ZMB 70187   | EU100238 | EU100122 |
| Microhylidae | Asterophryinae | <i>Metamagnusia</i> | <i>marani</i>           | WNG: Wondiwoi Mts.               | ZMB 70185   | EU100239 | EU100123 |
| Microhylidae | Asterophryinae | <i>Metamagnusia</i> | <i>slateri</i>          | —                                | —           | AF095339 | —        |
| Microhylidae | Asterophryinae | <i>Oreophryne</i>   | <i>asplenicola</i>      | WNG: Yapen Isl.                  | ZMB 65895   | EU100296 | EU100180 |
| Microhylidae | Asterophryinae | <i>Oreophryne</i>   | <i>asplenicola</i>      | WNG: Yapen Isl.                  | ZMB 65896   | EU100297 | EU100181 |
| Microhylidae | Asterophryinae | <i>Oreophryne</i>   | <i>atrigularis</i>      | WNG: Wondiwoi Mts.               | ZMB 62216   | EU100298 | EU100182 |
| Microhylidae | Asterophryinae | <i>Oreophryne</i>   | <i>atrigularis</i>      | WNG: Wondiwoi Mts.               | ZMB 62225   | EU100299 | EU100183 |
| Microhylidae | Asterophryinae | <i>Oreophryne</i>   | <i>atrigularis</i>      | WNG: Wondiwoi Mts.               | ZMB 62166   | EU100300 | EU100184 |
| Microhylidae | Asterophryinae | <i>Oreophryne</i>   | <i>atrigularis</i>      | WNG: Wondiwoi Mts.               | ZMB 62167   | EU100301 | EU100185 |
| Microhylidae | Asterophryinae | <i>Oreophryne</i>   | <i>atrigularis</i>      | WNG: Wondiwoi Mts.               | ZMB 70296   | EU100302 | EU100186 |
| Microhylidae | Asterophryinae | <i>Oreophryne</i>   | <i>atrigularis</i>      | WNG: Wondiwoi Mts.               | ZMB 70194   | EU100303 | EU100187 |
| Microhylidae | Asterophryinae | <i>Oreophryne</i>   | <i>atrigularis</i>      | WNG: Nabire-Mapia road           | ZMB 70298   | EU100304 | EU100188 |
| Microhylidae | Asterophryinae | <i>Oreophryne</i>   | <i>brachypus</i>        | PNG: W. New Britain: near Amelei | AMS R129618 | DQ283194 | DQ283194 |
| Microhylidae | Asterophryinae | <i>Oreophryne</i>   | <i>clamata</i>          | WNG: Wondiwoi Mts.               | ZMB 67353   | EU100305 | EU100189 |
| Microhylidae | Asterophryinae | <i>Oreophryne</i>   | <i>clamata</i>          | WNG: Wondiwoi Mts.               | ZMB 67354   | EU100306 | EU100190 |
| Microhylidae | Asterophryinae | <i>Oreophryne</i>   | <i>pseudasplenicola</i> | WNG: Yapen Isl.                  | ZMB 65897   | EU100307 | EU100191 |
| Microhylidae | Asterophryinae | <i>Oreophryne</i>   | <i>pseudasplenicola</i> | WNG: Yapen Isl.                  | ZMB 65898   | EU100308 | EU100192 |
| Microhylidae | Asterophryinae | <i>Oreophryne</i>   | <i>pseudasplenicola</i> | WNG: Yapen Isl.                  | ZMB 65900   | EU100309 | EU100193 |
| Microhylidae | Asterophryinae | <i>Oreophryne</i>   | <i>sibilans</i>         | WNG: Wondiwoi Mts.               | ZMB-RG6936  | EU100310 | EU100194 |
| Microhylidae | Asterophryinae | <i>Oreophryne</i>   | <i>sibilans</i>         | WNG: Wondiwoi Mts.               | ZMB 70191   | EU100313 | EU100197 |
| Microhylidae | Asterophryinae | <i>Oreophryne</i>   | <i>sibilans</i>         | WNG: Wondiwoi Mts.               | ZMB 70192   | EU100314 | EU100198 |
| Microhylidae | Asterophryinae | <i>Oreophryne</i>   | <i>sibilans</i>         | WNG: Yapen Isl.                  | ZMB 70301   | EU100311 | EU100195 |
| Microhylidae | Asterophryinae | <i>Oreophryne</i>   | <i>sibilans</i>         | WNG: Yapen Isl.                  | ZMB 70302   | EU100312 | EU100196 |
| Microhylidae | Asterophryinae | <i>Oreophryne</i>   | <i>unicolor</i>         | WNG: Wondiwoi Mts.               | ZMB 70188   | EU100315 | EU100199 |
| Microhylidae | Asterophryinae | <i>Oreophryne</i>   | <i>waira</i>            | WNG: Yapen Isl.                  | ZMB 65882   | EU100316 | EU100200 |
| Microhylidae | Asterophryinae | <i>Oreophryne</i>   | <i>waira</i>            | WNG: Yapen Isl.                  | ZMB 62337   | EU100317 | EU100201 |
| Microhylidae | Asterophryinae | <i>Oreophryne</i>   | <i>waira</i>            | WNG: Yapen Isl.                  | ZMB 62339   | EU100318 | EU100202 |
| Microhylidae | Asterophryinae | <i>Oreophryne</i>   | <i>waira</i>            | WNG: Yapen Isl.                  | ZMB 62335   | EU100319 | EU100203 |
| Microhylidae | Asterophryinae | <i>Oreophryne</i>   | <i>cf. wapoga</i>       | WNG: Yapen Isl.                  | ZMB 65186   | EU100320 | EU100204 |
| Microhylidae | Asterophryinae | <i>Oreophryne</i>   | <i>cf. wapoga</i>       | WNG: Yapen Isl.                  | ZMB-RG7417  | EU100321 | EU100205 |

|                     |                       |                             |                                  |                                       |                    |                 |                 |
|---------------------|-----------------------|-----------------------------|----------------------------------|---------------------------------------|--------------------|-----------------|-----------------|
| Microhylidae        | Asterophryinae        | <i>Oreophryne</i>           | <i>cf. wapoga</i>                | WNG: Yapen Isl.                       | ZMB 70304          | EU100322        | EU100206        |
| Microhylidae        | Asterophryinae        | <i>Oxydactyla</i>           | <i>crassa</i>                    | PNG: Milne Bay: Mt. Simpson           | BPBM 17061         | EU100323        | EU100207        |
| <b>Microhylidae</b> | <b>Asterophryinae</b> | <b><i>Paedophryne</i></b>   | <b><i>amauensis sp. nov.</i></b> | <b>PNG: Central: Amau</b>             | <b>LSUMZ 95001</b> | <b>JN049021</b> | <b>JN048996</b> |
| <b>Microhylidae</b> | <b>Asterophryinae</b> | <b><i>Paedophryne</i></b>   | <b><i>amauensis sp. nov.</i></b> | <b>PNG: Central: Amau</b>             | <b>LSUMZ 95003</b> | <b>JN049023</b> | <b>JN048998</b> |
| <b>Microhylidae</b> | <b>Asterophryinae</b> | <b><i>Paedophryne</i></b>   | <b><i>oyatabu</i></b>            | <b>PNG: Milne Bay: Fergusson Isl.</b> | <b>BPBM 16433</b>  | —               | <b>JN049002</b> |
| <b>Microhylidae</b> | <b>Asterophryinae</b> | <b><i>Paedophryne</i></b>   | <b><i>swiftorum sp. nov.</i></b> | <b>PNG: Morobe: Kamiali</b>           | <b>BPBM 31882</b>  | <b>JN049003</b> | <b>JN048978</b> |
| <b>Microhylidae</b> | <b>Asterophryinae</b> | <b><i>Pherohapsis</i></b>   | <b><i>menziesi</i></b>           | <b>PNG: NCD: Brown River</b>          | <b>LSUMZ 94178</b> | <b>JN049010</b> | <b>JN048985</b> |
| <b>Microhylidae</b> | <b>Asterophryinae</b> | <b><i>Pherohapsis</i></b>   | <b><i>sp.</i></b>                | <b>PNG: Central: Amau</b>             | <b>LSUMZ 95094</b> | <b>JN049019</b> | <b>JN048994</b> |
| Microhylidae        | Asterophryinae        | <i>Pseudocallulops</i>      | <i>eurydactylus</i>              | WNG: Fakfak Mts.                      | ZMB 63878          | EU100236        | EU100120        |
| Microhylidae        | Asterophryinae        | <i>Pseudocallulops</i>      | <i>pullifer</i>                  | WNG: Wondiwoi Mts.                    | ZMB 62053          | EU100240        | EU100124        |
| Microhylidae        | Asterophryinae        | <i>Pseudocallulops</i>      | <i>pullifer</i>                  | WNG: Wondiwoi Mts.                    | ZMB 64161          | EU100241        | EU100125        |
| Microhylidae        | Asterophryinae        | <i>Pseudocallulops</i>      | <i>pullifer</i>                  | WNG: Wondiwoi Mts.                    | ZMB 64162          | EU100242        | EU100126        |
| Microhylidae        | Asterophryinae        | <i>Pseudocallulops</i>      | <i>pullifer</i>                  | WNG: Wondiwoi Mts.                    | ZMB 64163          | EU100243        | EU100127        |
| Microhylidae        | Asterophryinae        | <i>Pseudocallulops</i>      | <i>pullifer</i>                  | WNG: Wondiwoi Mts.                    | ZMB 64164          | EU100244        | EU100128        |
| Microhylidae        | Asterophryinae        | <i>Pseudocallulops</i>      | <i>pullifer</i>                  | WNG: Wondiwoi Mts.                    | ZMB 64169          | EU100245        | EU100129        |
| Microhylidae        | Asterophryinae        | <i>Sphenophryne</i>         | <i>cornuta</i>                   | WNG: Wondiwoi Mts.                    | ZMB 62195          | EU100324        | EU100208        |
| Microhylidae        | Asterophryinae        | <i>Sphenophryne</i>         | <i>cornuta</i>                   | WNG: Wondiwoi Mts.                    | ZMB 62198          | EU100325        | EU100209        |
| Microhylidae        | Asterophryinae        | <i>Sphenophryne</i>         | <i>cornuta</i>                   | WNG: Wondiwoi Mts.                    | ZMB 70309          | EU100326        | EU100210        |
| <b>Microhylidae</b> | <b>Asterophryinae</b> | <b><i>Xenobatrachus</i></b> | <b><i>sp. 1</i></b>              | <b>PNG: Gulf: Sobo</b>                | <b>LSUMZ 94840</b> | <b>JN049005</b> | <b>JN048980</b> |
| <b>Microhylidae</b> | <b>Asterophryinae</b> | <b><i>Xenobatrachus</i></b> | <b><i>sp. 1</i></b>              | <b>PNG: Gulf: Sobo</b>                | <b>LSUMZ 94835</b> | <b>JN049024</b> | <b>JN048999</b> |
| <b>Microhylidae</b> | <b>Asterophryinae</b> | <b><i>Xenobatrachus</i></b> | <b><i>sp. 2</i></b>              | <b>PNG: Gulf: Sobo</b>                | <b>LSUMZ 95999</b> | <b>JN049009</b> | <b>JN048984</b> |
| <b>Microhylidae</b> | <b>Asterophryinae</b> | <b><i>Xenobatrachus</i></b> | <b><i>sp. 3</i></b>              | <b>PNG: Sandaun: Utai</b>             | <b>LSUMZ 94828</b> | <b>JN049012</b> | <b>JN048987</b> |
| <b>Microhylidae</b> | <b>Asterophryinae</b> | <b><i>Xenobatrachus</i></b> | <b><i>sp. 4</i></b>              | <b>PNG: Sandaun: Utai</b>             | <b>LSUMZ94829</b>  | <b>JN049013</b> | <b>JN048988</b> |
| Microhylidae        | Asterophryinae        | <i>Xenorhina</i>            | <i>bouwensi</i>                  | WNG: Wondiwoi Mts.                    | ZMB 62639          | EU100327        | EU100211        |
| Microhylidae        | Asterophryinae        | <i>Xenorhina</i>            | <i>bouwensi</i>                  | WNG: Wondiwoi Mts.                    | ZMB 62638          | EU100328        | EU100212        |
| Microhylidae        | Asterophryinae        | <i>Xenorhina</i>            | <i>bouwensi</i>                  | WNG: Wondiwoi Mts.                    | ZMB 65138          | EU100329        | EU100213        |
| Microhylidae        | Asterophryinae        | <i>Xenorhina</i>            | <i>bouwensi</i>                  | WNG: Wondiwoi Mts.                    | ZMB 65139          | EU100330        | EU100214        |
| Microhylidae        | Asterophryinae        | <i>Xenorhina</i>            | <i>lanthanites</i>               | WNG: Yapen Isl.                       | ZMB 69561          | EU100331        | EU100215        |
| Microhylidae        | Asterophryinae        | <i>Xenorhina</i>            | <i>oxycephala</i>                | WNG: Wondiwoi Mts.                    | ZMB 69562          | EU100332        | EU100216        |
| Microhylidae        | Asterophryinae        | <i>Xenorhina</i>            | <i>varia</i>                     | WNG: Yapen Isl.                       | ZMB 65133          | EU100333        | EU100217        |
| Microhylidae        | Asterophryinae        | <i>Xenorhina</i>            | <i>varia</i>                     | WNG: Yapen Isl.                       | ZMB 65136          | EU100334        | EU100218        |
| Microhylidae        | Asterophryinae        | <i>Xenorhina</i>            | <i>varia</i>                     | WNG: Yapen Isl.                       | ZMB 65137          | EU100335        | EU100219        |
| Microhylidae        | Cophylinae            | <i>Platypelis</i>           | <i>grandis</i>                   | Madagascar: Antsiranana               | AMNH A167214       | DQ283410        | DQ283410        |
| Microhylidae        | Cophylinae            | <i>Platypelis</i>           | <i>grandis</i>                   | Madagascar: Montagne d'Ambre          | UADBA24118         | EU341099        | EU341099        |
| Microhylidae        | Cophylinae            | <i>Plethodontohyla</i>      | <i>bipunctata</i>                | Madagascar: Andohahela                | ZSM 89/2004        | EU341068        | EU341068        |
| Microhylidae        | Cophylinae            | <i>Plethodontohyla</i>      | <i>sp.</i>                       | Madagascar: Antsiranana               | AMNH A167315       | DQ283409        | DQ283409        |
| Microhylidae        | Cophylinae            | <i>Stumpffia</i>            | <i>gimmeli</i>                   | Madagascar: Berara                    | ZSM 412/2000       | EU341084        | EU341084        |
| Microhylidae        | Cophylinae            | <i>Stumpffia</i>            | <i>psologlossa</i>               | Madagascar: Antsiranana               | AMNH A167359       | DQ283411        | DQ283411        |
| Microhylidae        | Dyscophinae           | <i>Dyscophus</i>            | <i>antongilii</i>                | Madagascar: Maroantsetra              | DA2005-23          | EU341120        | EU341120        |
| Microhylidae        | Dyscophinae           | <i>Dyscophus</i>            | <i>guineti</i>                   | pet trade                             | RdS                | DQ283434        | DQ283434        |
| Microhylidae        | Gastrophryinae        | <i>Ctenophryne</i>          | <i>geayi</i>                     | Guyana: Berbice River                 | AMNH A166444       | DQ283383        | DQ283383        |
| Microhylidae        | Gastrophryinae        | <i>Dasypops</i>             | <i>schirchi</i>                  | Brazil: Reserva do Vale               | CFBH-T 71          | DQ283095        | DQ283095        |
| Microhylidae        | Gastrophryinae        | <i>Elachistocleis</i>       | <i>ovalis</i>                    | Guyana: Berbice River                 | AMNH A141136       | DQ283405        | DQ283405        |

|              |                  |                      |                     |                              |               |          |          |
|--------------|------------------|----------------------|---------------------|------------------------------|---------------|----------|----------|
| Microhylidae | Gastrophryninae  | <i>Gastrophryne</i>  | <i>elegans</i>      | Belize: Cockscomb Basin      | RdS726        | DQ283426 | DQ283426 |
| Microhylidae | Gastrophryninae  | <i>Gastrophryne</i>  | <i>olivacea</i>     | USA: Arizona: Santa Cruz Co. | ATH 476       | DQ283268 | DQ283268 |
| Microhylidae | Gastrophryninae  | <i>Hamptophryne</i>  | <i>boliviana</i>    | Peru                         | RdS           | DQ283438 | DQ283438 |
| Microhylidae | Hoplophryninae   | <i>Hoplophryne</i>   | <i>rogersi</i>      | Tanzania: East Usumbaras Mts | RdS 949       | DQ283419 | DQ283419 |
| Microhylidae | Kalophryninae    | <i>Kalophrynus</i>   | <i>pleurostigma</i> | Malaysia: Sabah              | CMNH-RMB2252  | DQ283146 | DQ283146 |
| Microhylidae | Microhylinae     | <i>Calluella</i>     | <i>guttulata</i>    | Vietnam: Gia Lai Province    | FMNH 252955   | DQ283144 | DQ283144 |
| Microhylidae | Microhylinae     | <i>Kaloula</i>       | <i>conjuncta</i>    | Philippines: Negros          | CMNH-RMB2252  | AY326064 | AY326064 |
| Microhylidae | Microhylinae     | <i>Kaloula</i>       | <i>pulchra</i>      | Vietnam: Ha Tinh Province    | AMCC 106697   | DQ283397 | DQ283397 |
| Microhylidae | Microhylinae     | <i>Kaloula</i>       | <i>pulchra</i>      | pet trade                    | RdS 02        | DQ283398 | DQ283398 |
| Microhylidae | Microhylinae     | <i>Microhyla</i>     | <i>heymonsi</i>     | Vietnam: Ha Giang, Yen Minh  | AMNH A163850  | DQ283382 | DQ283382 |
| Microhylidae | Microhylinae     | <i>Microhyla</i>     | <i>sp</i>           | pet trade                    | RdS 05        | DQ283422 | DQ283422 |
| Microhylidae | Phrynomerinae    | <i>Phrynomantis</i>  | <i>bifasciatus</i>  | pet trade                    | RdS           | DQ283154 | DQ283154 |
| Microhylidae | Phrynomerinae    | <i>Phrynomantis</i>  | <i>sp.</i>          | —                            | TNHC 61077    | AY326065 | AY326065 |
| Microhylidae | Scaphiophryninae | <i>Paradoxophyla</i> | <i>palmata</i>      | Madagascar: Ranomafana       | FGMV 2002.467 | EU341121 | EU341121 |
| Microhylidae | Scaphiophryninae | <i>Scaphiophryne</i> | <i>brevis</i>       | Madagascar: Berenty          | MVTIS 2002-B2 | EU341117 | EU341117 |
| Microhylidae | Scaphiophryninae | <i>Scaphiophryne</i> | <i>marmorata</i>    | Madagascar: Antsiranana      | AMNH A167395  | AY843751 | AY843751 |
